# Supplementary material for: Synthesis of ethylene–norbornene–1-octene terpolymers with high 1-octene contents, molar masses, and tunable Tg values, in high yields using half-titanocene catalysts
Source: Royal Society of Chemistry journal article supplement (doi:10.1039/d1py00647a), 2021-01-01

## Electronic Supplementary Information

for

### **Ethylene-norbornene-1-octene terpolymers with high 1-octene content, molar masses, tunable $T_g$ values, in high yield by half-titanocene catalysts**

Laura Boggioni,<sup>a</sup> Hitoshi Harakawa,<sup>b</sup> Simona Losio,<sup>a</sup> Kotohiro Nomura,<sup>b\*</sup> Incoronata Tritto<sup>a\*</sup>

<sup>a</sup>Istituto di Scienze e Tecnologie Chimiche “G. Natta”, Consiglio Nazionale delle Ricerche, Via A. Corti, 12, 20133 Milano, Italy

<sup>b</sup> Department of Chemistry, Tokyo Metropolitan University, 1-1 Minami Osawa, Hachioiji, Tokyo 192-0397, Japan

### Determination of termonomer content.

On the basis of the peak intensity of carbons in the  $^{13}\text{C}$  NMR spectra it was possible to estimate the content of norbornene, ethylene, and 1-octene in the terpolymers. The composition of poly(E-*ter*-N-*ter*-O) was calculated according to the following equations:

$$\text{N (mol- \%)} = \frac{[\text{N}]}{[\text{N}] + [\text{E}] + [\text{O}]} \times 100 = \frac{\bar{I}_{\text{N}}}{\bar{I}_{\text{N}} + \bar{I}_{\text{E}} + \bar{I}_{\text{O}}} \times 100 \quad (1)$$

$$\text{O (mol- \%)} = \frac{[\text{O}]}{[\text{N}] + [\text{E}] + [\text{O}]} \times 100 = \frac{\bar{I}_{\text{O}}}{\bar{I}_{\text{N}} + \bar{I}_{\text{E}} + \bar{I}_{\text{O}}} \times 100 \quad (2)$$

$$\bar{I}_{\text{N}} = \frac{1}{2} I_{2/3} \quad (3)$$

$$\bar{I}_{\text{E}} = \frac{1}{2} (I_{\text{CH}_2} - 2\bar{I}_{\text{N}} - 3\bar{I}_{\text{O}}) \quad (4)$$

$$\bar{I}_{\text{O}} = I_{1\text{B}_6} \quad (5)$$

where  $I_{2/3}$  is the peak intensity of the methine carbons C2/C3 in the norbornene units,  $I_{\text{CH}_2}$  is the total area of peaks from 30.6 to 24.3 ppm, and  $I_{1\text{B}_6}$  indicates the peak intensity of the methyl carbon 1B<sub>6</sub> in the 1-octene unit.

**Table 1S.**  $^1\text{H}$  NMR data of the olefinic chain ends in the investigated terpolymers.<sup>a</sup>

| Structure | Short name  | $^1\text{H}$ NMR (ppm)    | Structure | Short name  | $^1\text{H}$ NMR (ppm)    |
|-----------|-------------|---------------------------|-----------|-------------|---------------------------|
|           | <b>Vy-1</b> | a: 4.86 – 4.93<br>d: 5.62 |           | <b>Vy-2</b> | a: 4.84 – 4.89<br>d: 5.39 |
|           | <b>E-1</b>  | b: 5.03<br>c: 5.22        |           | <b>E-2</b>  | b: 5.08<br>c: 5.24        |
|           | <b>E-3</b>  | b: 5.03<br>c: 5.22        |           | <b>E-4</b>  | c: 5.28 – 5.32            |
|           | <b>E-5</b>  | c: 5.29 – 5.32            |           | <b>E-6</b>  | c: 5.33                   |
|           | <b>E-7</b>  | c: 5.32                   |           |             |                           |
|           | <b>N-1</b>  | e: 5.50                   |           | <b>N-2</b>  | b: 5.31                   |
|           | <b>O-1</b>  | b: 5.10                   |           | <b>O-2</b>  | b: 5.08                   |
|           | <b>O-3</b>  | b: 5.07                   |           | <b>O-4</b>  | f: 4.63                   |
|           | <b>O-5</b>  | f: 4.68                   |           |             |                           |

<sup>a</sup> Chemical shifts are those observed in the spectra of the terpolymers of this study, while assignments were made on the base of ref 47.

Figure 1S. DSC Curves of Entries 4, 5, and 6 prepared by catalysts 2.

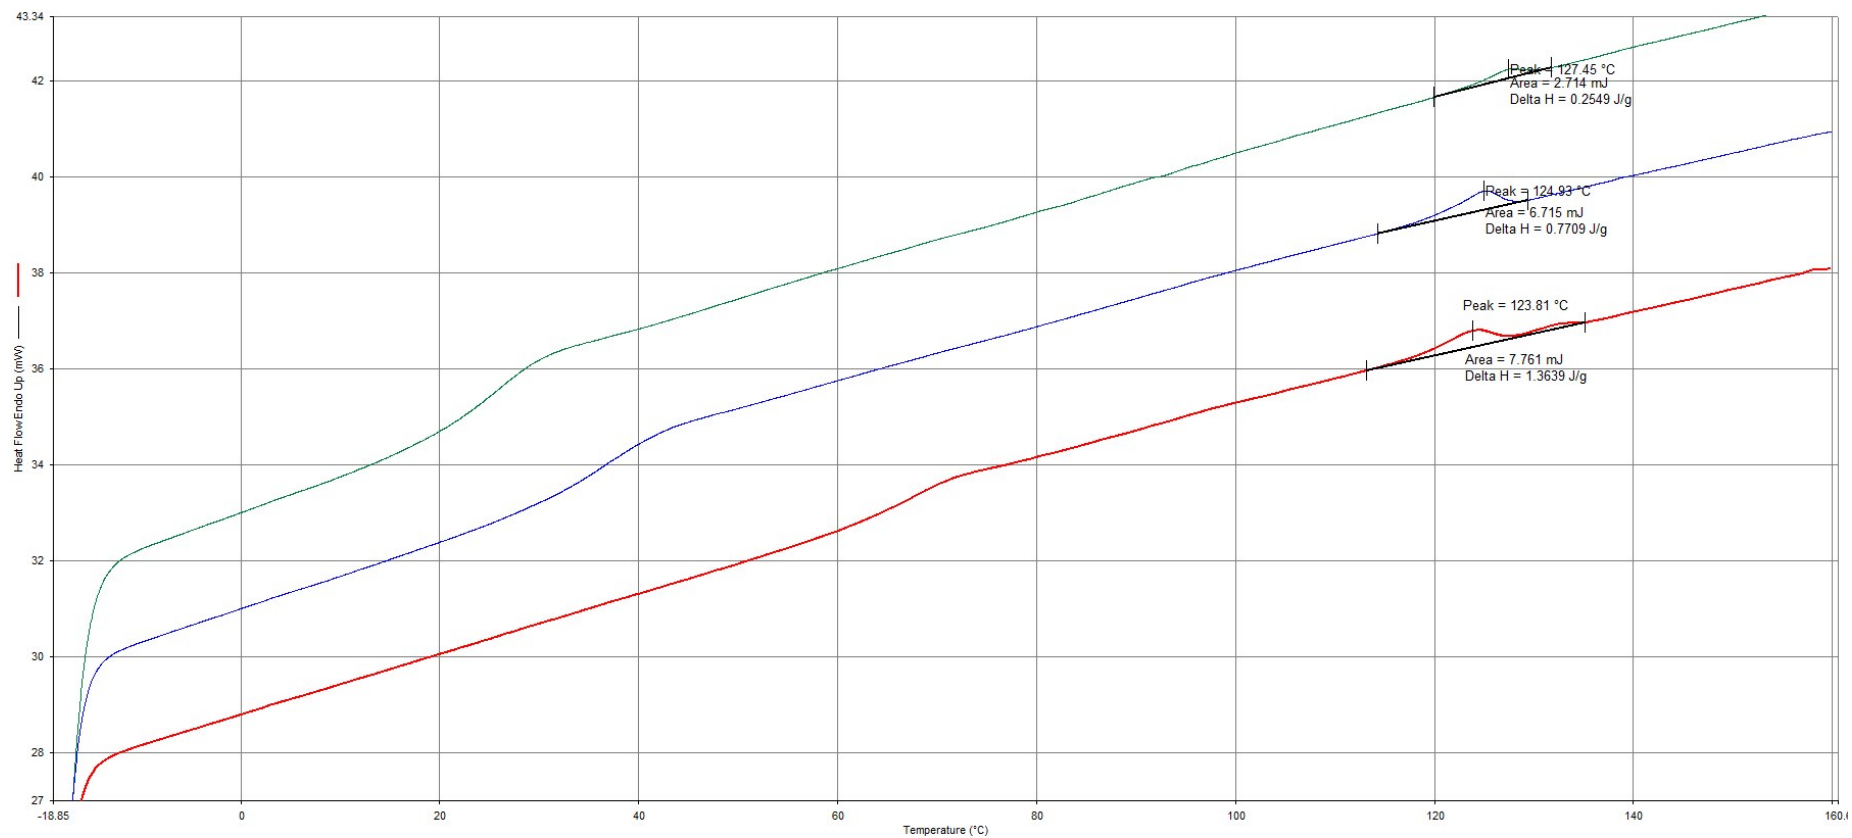

- Entry 4
- Entry 5
- Entry 6



Figure 2S. GPC Curves of Entries 1, 2, and 3 prepared by catalysts 1

### Entry 1

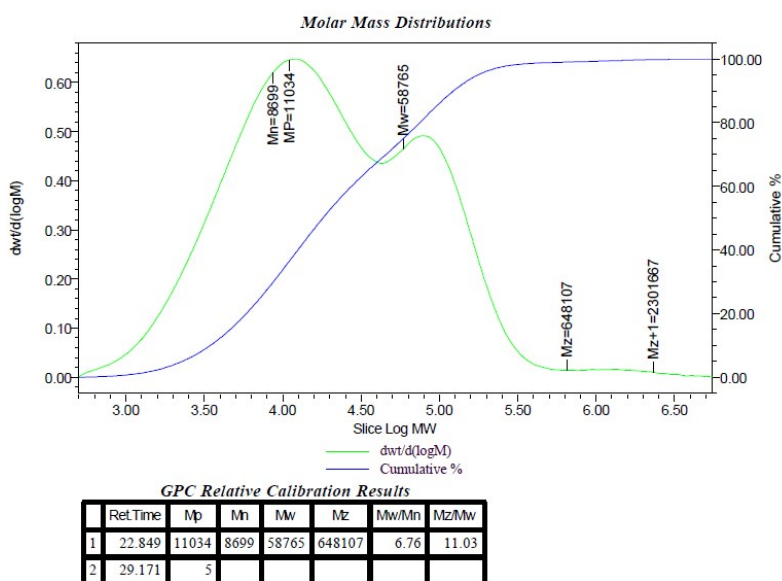

### Entry 2

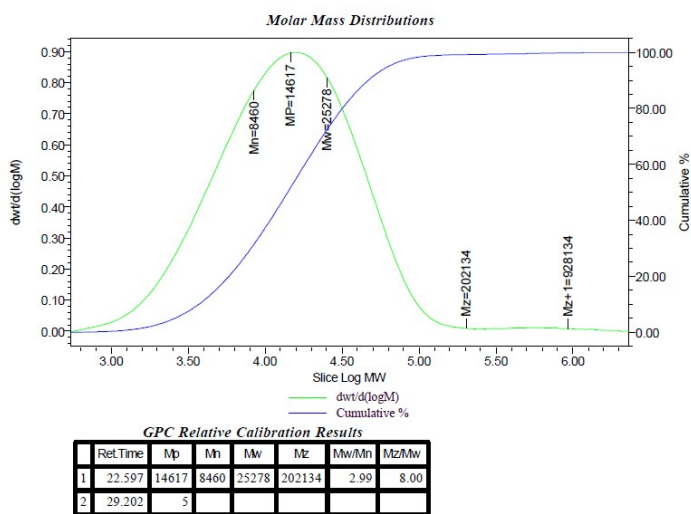

### Entry 3

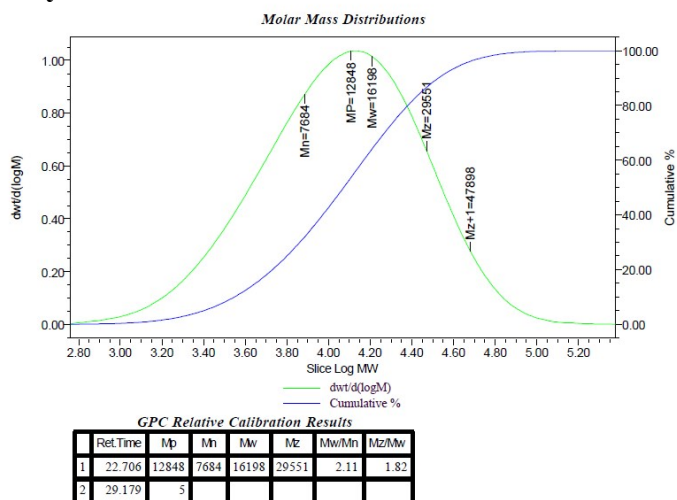

Figure 3S. GPC Curves of Entries 10, 11, and 12 prepared by catalysts 2

### Entry 10

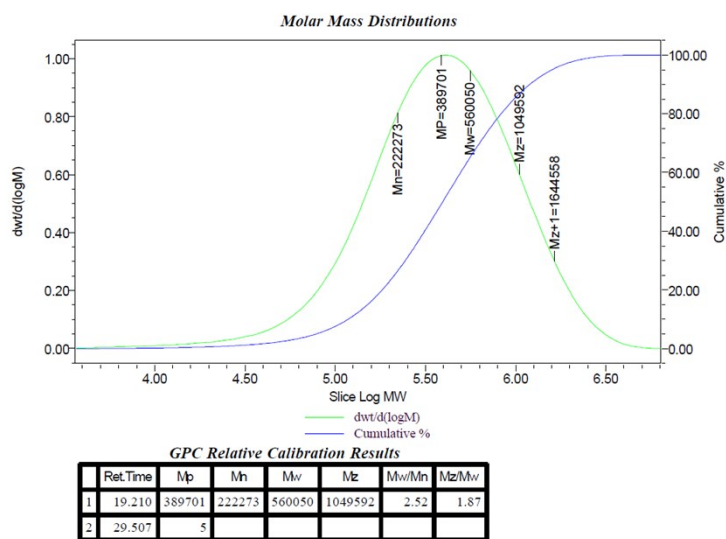

### Entry 11

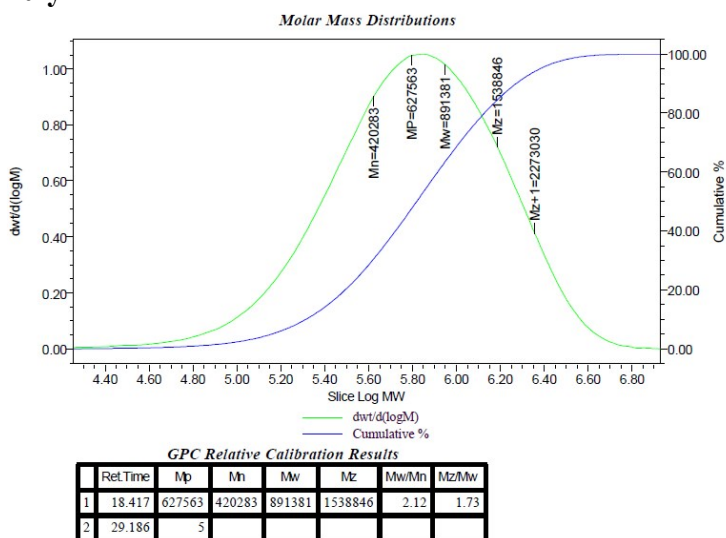

### Entry 12

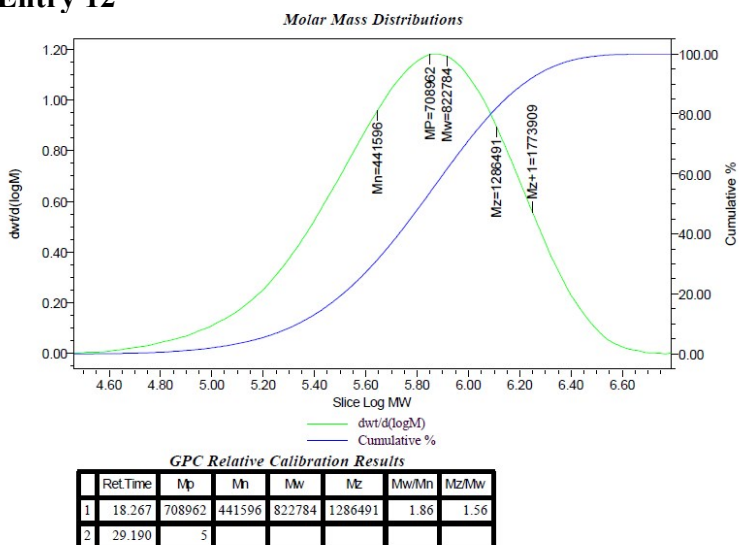

Supplement: d1py00647a1.pdf [file d1py00647a1.pdf]
